# Supplementary material for: γδ T cells are effectors of immunotherapy in cancers with HLA class I defects
Source: PubMed Central journal article supplement (PMC9876799; doi:10.1038/s41586-022-05593-1), 2023-01-11
Supplement: 41586_2022_5593_MOESM1_ESM.pdf [file 41586_2022_5593_MOESM1_ESM.pdf]

---

**Supplementary information**

---

**$\gamma\delta$  T cells are effectors of immunotherapy in cancers with HLA class I defects**

---

In the format provided by the authors and unedited

## Supplementary information

### Supplemental Table 1. Characteristics of clinical samples from 71 patients with MMR-d cancers from the DRUP study.

See separate - Excel table

### Supplemental Table 2. Immune marker gene sets for bulk RNA-seq analyses.

See separate - Excel table

### Supplemental Table 3. Characteristics of clinical samples from 2,256 patients with MMR-p cancers from the Hartwig database.

See separate - Excel table

### Supplemental Table 4. Characteristics of clinical samples from 17 patients with ICB-naïve MMR-d colon cancer.

| Patient ID | Tumor location   | HLA class I status | $\beta 2m$ status | <i>B2M</i> status | Subgroup     |
|------------|------------------|--------------------|-------------------|-------------------|--------------|
| CRC 1      | Flexura lienalis | Positive           | Positive          | Wildtype          | $\beta 2m^+$ |
| CRC 2      | Coecum           | Defect             | Mut pattern       | Wildtype          | $\beta 2m^+$ |
| CRC 3      | Flexura hepatica | Positive           | Positive          | Wildtype          | $\beta 2m^+$ |
| CRC 6      | Descendens       | Defect             | Defect            | Mutated           | $\beta 2m^-$ |
| CRC 19     | Ascendens        | Defect             | Defect            | Mutated           | $\beta 2m^-$ |
| CRC 52     | Ascendens        | Defect             | Mut pattern       | Wildtype          | $\beta 2m^+$ |
| CRC 67     | Transversum      | Positive           | Positive          | Wildtype          | $\beta 2m^+$ |
| CRC 84     | Sigmoid          | Defect             | Defect            | Wildtype          | $\beta 2m^-$ |
| CRC 94 #   | Sigmoid          | Defect             | Positive          | Wildtype          | $\beta 2m^+$ |
| CRC 96* #  | Transversum      | Defect             | Defect            | Mutated           | $\beta 2m^-$ |
| CRC 102    | Ascendens        | Defect             | Positive          | Wildtype          | $\beta 2m^+$ |
| CRC 134* # | Ascendens        | Defect             | Defect            | Mutated           | $\beta 2m^-$ |
| CRC 154* # | Flexura hepatica | Positive           | Positive          | Wildtype          | $\beta 2m^+$ |
| CRC 159*   | Coecum           | Defect             | Mut pattern       | Wildtype          | $\beta 2m^+$ |
| CRC 167* # | Ascendens        | Defect             | Mut pattern       | Wildtype          | $\beta 2m^+$ |
| CRC 177    | Flexura hepatica | Defect             | Positive          | Wildtype          | $\beta 2m^+$ |
| CRC 195    | Flexura hepatica | Defect             | Positive          | Wildtype          | $\beta 2m^+$ |

\* Used for single-cell RNA-sequencing experiments, # Used for cell culturing experiments. *B2M*,  $\beta 2$ -microglobulin; MMR, mismatch repair.

**Supplemental Table 5. Characteristics of patient-derived organoids from MMR-d colorectal cancer.**

| Sample                      | PDTO-1 WT                                                     | PDTO-1 <i>B2M</i> ko                                                                  | PDTO-2 WT                              | PDTO-2 <i>B2M</i> ko                                                                  |
|-----------------------------|---------------------------------------------------------------|---------------------------------------------------------------------------------------|----------------------------------------|---------------------------------------------------------------------------------------|
| <b>Tumor</b>                | CRC                                                           | CRC                                                                                   | CRC                                    | CRC                                                                                   |
| <b>MMR status</b>           | deficient                                                     | deficient                                                                             | deficient                              | deficient                                                                             |
| <b>Biopsy / Resection</b>   | Resection                                                     | Resection                                                                             | Biopsy                                 | Biopsy                                                                                |
| <b>Biopsied lesion</b>      | Colon                                                         | Colon                                                                                 | Peritoneal                             | Peritoneal                                                                            |
| <b>Primary / Metastasis</b> | Primary                                                       | Primary                                                                               | Metastasis                             | Metastasis                                                                            |
| <b>Authenticated</b>        | Confirmed by SNP                                              | Confirmed by STR                                                                      | Confirmed by SNP                       | Confirmed by SNP                                                                      |
| <b>Mycoplasma</b>           | Negative                                                      | Negative                                                                              | Negative                               | Negative                                                                              |
| <b>Characteristics</b>      | Luciferase transduced; parental line of PDTO-1 <i>B2M</i> -KO | <i>B2M</i> -knockout of PDTO-1 WT                                                     | Parental line of PDTO-2 <i>B2M</i> -KO | <i>B2M</i> -knockout of PDTO-2 WT                                                     |
| <b><i>B2M</i> knockout</b>  | -                                                             | sgRNA targeting <i>B2M</i> (GGCCGAGATGTCTCGCTCC G) cloned into LentiCRISPR v2 plasmid | -                                      | sgRNA targeting <i>B2M</i> (GGCCGAGATGTCTCGCTCC G) cloned into LentiCRISPR v2 plasmid |

**Supplemental Table 6. Antibodies used for imaging mass cytometry of colon cancers.**

| Antibody          | Metal  | Clone         | Supplier                 | Catalog number | Lot number    | Incubation time (temperature) | Dilution |
|-------------------|--------|---------------|--------------------------|----------------|---------------|-------------------------------|----------|
| $\beta$ -catenin  | 89Y    | D10A8         | CST                      | 8480BF         | 8             | Overnight (4°C)               | 1:100    |
| CD103             | 168 Er | EPR4166(2)    | Abcam                    | ab221210       | GR3355784-7   | 5h (RT)                       | 1:50     |
| CD11b             | 144 Nd | D6X1N         | CST                      | 49420BF        | 4             | 5h (RT)                       | 1:100    |
| CD11c             | 176 Yb | EP1347Y       | Abcam                    | ab216655       | GR3357092-9   | 5h (RT)                       | 1:100    |
| CD14              | 163 Dy | D7A2T         | CST                      | 56082BF        | 2             | 5h (RT)                       | 1:100    |
| CD15              | 171 Yb | MC480         | CST                      | 4744BF         | 5             | Overnight (4°C)               | 1:100    |
| CD163             | 173 Yb | EPR14643-36   | Abcam                    | 93498BF        | Not available | 5h (RT)                       | 1:50     |
| CD20              | 142 Nd | E7B7T         | CST                      | 48750BF        | 9179056       | Overnight (4°C)               | 1:100    |
| CD204             | 164 Dy | J5HTR3        | Thermo Fisher Scientific | 14-9054-95     | 4338161       | 5h (RT)                       | 1:50     |
| CD3               | 153 Eu | EP449E        | Abcam                    | ab271850       | GR3341846-3   | Overnight (4°C)               | 1:50     |
| CD31              | 147 Sm | 89C2          | CST                      | 3528BF         | Not available | Overnight (4°C)               | 1:100    |
| CD38              | 169 Tm | EPR4106       | Abcam                    | ab226034       | GR3378690-1   | Overnight (4°C)               | 1:100    |
| CD39              | 157 Gd | EPR20627      | Abcam                    | ab236038       | GR3274485-6   | 5h (RT)                       | 1:100    |
| CD4*              | 145 Nd | EPR6855       | Abcam                    | ab181724       | GR3285644-10  | Overnight (RT)                | 1:100    |
| CD45              | 149 Sm | D9M8I         | CST                      | 13917BF        | 11            | Overnight (4°C)               | 1:50     |
| CD45RO            | 165 Ho | UCHL1         | CST                      | 55618BF        | 2             | Overnight (4°C)               | 1:100    |
| CD56              | 167 Er | E7X9M         | CST                      | 99746BF        | 2             | 5h (RT)                       | 1:100    |
| CD57              | 151 Eu | HNK-1 / Leu-7 | Abcam                    | ab269781       | GR3373313-3   | Overnight (4°C)               | 1:100    |
| CD68              | 143 Nd | D4B9C         | CST                      | 76437BF        | 2             | Overnight (4°C)               | 1:100    |
| CD7               | 174 Yb | EPR4242       | Abcam                    | ab230834       | Not available | 5h (RT)                       | 1:100    |
| CD8 $\alpha$      | 146 Nd | D8A8Y         | CST                      | 85336BF        | Not available | 5h (RT)                       | 1:50     |
| Cleaved caspase-3 | 172 Yb | 5A1E          | CST                      | 9664BF         | 24            | 5h (RT)                       | 1:100    |
| D2-40             | 166 Er | D2-40         | BioLegend                | 916606         | B316467       | Overnight (4°C)               | 1:100    |
| FOXP3             | 159 Tb | D608R         | CST                      | 12653BF        | 8             | Overnight (4°C)               | 1:50     |
| Granzyme B        | 150 Nd | D6E9W         | CST                      | 46890BF        | 3             | 5h (RT)                       | 1:100    |
| Histone H3        | 209    | D1H2          | CST                      | 4499BF         | Not available | Overnight (4°C)               | 1:50     |
| HLA-DR            | 141 Pr | TAL 1B5       | Abcam                    | ab176408       | GR3384096-1   | 5h (RT)                       | 1:100    |
| ICOS              | 161 Dy | D1K2T™        | CST                      | 89601BF        | 4             | 5h (RT)                       | 1:50     |
| IDO               | 162 Dy | D5J4E™        | CST                      | 86630BF        | 7             | Overnight (4°C)               | 1:100    |
| Ki-67             | 152 Sm | 8D5           | CST                      | 9449BF         | 11            | Overnight (4°C)               | 1:100    |

|                |           |                    |                                |                    |                 |                 |       |
|----------------|-----------|--------------------|--------------------------------|--------------------|-----------------|-----------------|-------|
| LAG-3          | 155<br>Gd | D2G40™             | CST                            | 15372BF            | Not available   | 5h (RT)         | 1:50  |
| p16ink4a       | 175<br>Lu | D3W8G              | CST                            | 92803BF            | 2               | Overnight (4°C) | 1:100 |
| Pan-keratin    | 198<br>Pt | C11 and<br>AE1/AE3 | CST /<br>BioLegend             | 4545BF /<br>914204 | 12 /<br>B302316 | Overnight (4°C) | 1:50  |
| PD-1           | 160<br>Gd | D4W2J              | CST                            | 86163BF            | 7               | 5h (RT)         | 1:50  |
| PD-L1          | 156<br>Gd | E1L3N <sup>R</sup> | CST                            | 13684BF            | 17              | Overnight (4°C) | 1:50  |
| T-bet          | 170<br>Er | 4B10               | BioLegend                      | 644825             | B298378         | 5h (RT)         | 1:50  |
| TCR $\delta^*$ | 148<br>Nd | H41                | Santa Cruz                     | sc-100289          | D3021           | Overnight (RT)  | 1:50  |
| TGF $\beta$    | 115<br>In | TB21               | Thermo<br>Fisher<br>Scientific | MA5-<br>16949      | 151471          | 5h (RT)         | 1:100 |
| TIM-3          | 154<br>Sm | D5D5R™             | CST                            | 45208BF            | 9               | 5h (RT)         | 1:100 |
| Vimentin       | 194<br>Pt | D21H3              | CST                            | 5741BF             | 9               | Overnight (4°C) | 1:50  |
| VISTA          | 158<br>Gd | D1L2G™             | CST                            | 64953BF            | 7               | 5h (RT)         | 1:100 |

\* Detection with metal-conjugated secondary antibodies. CST, Cell Signaling Technology.

**Supplemental Table 7. Antibodies used for immunophenotyping of  $\gamma\delta$  T cells by flow cytometry.**

| Antibody              | Fluorochrome | Clone    | Supplier        | Catalog number | Lot number  | Dilution |
|-----------------------|--------------|----------|-----------------|----------------|-------------|----------|
| CD16                  | PE           | B73.1    | BD Biosciences  | 332779         | 9045985     | 1:60     |
| CD103                 | FITC         | Ber-ACT8 | BD Biosciences  | 550259         | 2332847     | 1:10     |
| CD122/IL-2R $\beta$   | BV421        | TU27     | BioLegend       | 339010         | B313155     | 1:20     |
| CD132/IL-2R $\gamma$  | APC          | TUGh4    | BioLegend       | 338608         | B293032     | 1:80     |
| CD161                 | BV605        | DX12     | BD Biosciences  | 563863         | 7030586     | 1:20     |
| CD25/IL-2R $\alpha$   | PE-Cy7       | M-A251   | BD Biosciences  | 557741         | 9301660     | 1:25     |
| CD215/IL-15R $\alpha$ | PE           | JM7A4    | BioLegend       | 330208         | B265801     | 1:80     |
| CD226/DNA M-1         | BV510        | DX11     | BD Biosciences  | 742494         | 9203072     | 1:150    |
| CD3                   | Am Cyan      | SK7      | BD Biosciences  | 339186         | 9161745     | 1:20     |
| CD32                  | APC          | FLI8.26  | BD Biosciences  | 559769         | 184743      | 1:20     |
| CD38                  | PE-Cy7       | HIT2     | eBioscience     | 25-0389-42     | 4319912     | 1:200    |
| CD39                  | APC          | A1       | BioLegend       | 328210         | B249211     | 1:60     |
| CD45RA                | FITC         | L48      | BD Biosciences  | 335039         | 8227525     | 1:30     |
| CD45RA                | PE-Dazzle594 | HI100    | Sony            | 2120730        | 126470      | 1:20     |
| CD45RO                | PerCP-Cy5.5  | UCHL1    | Sony            | 2121110        | 138351      | 1:20     |
| CD56                  | APC-R700     | NCAM16.2 | BD Biosciences  | 565139         | 5251693     | 1:150    |
| CD64                  | FITC         | 10.1     | BD Biosciences  | 555527         | 58058       | 1:20     |
| CD69                  | PerCP-Cy5.5  | FN50     | BioLegend       | 310925         | B266970     | 1:200    |
| CD8 $\alpha$          | BV605        | SK1      | BD Biosciences  | 564115         | 7092        | 1:100    |
| CD94                  | BV605        | HP-3D9   | BD Biosciences  | 743950         | 7138571     | 1:200    |
| GITR                  | PE           | 108-17   | BioLegend       | 371204         | B244963     | 1:50     |
| Granzyme B*           | PE           | GB11     | eBiosciences    | 12-8899-41     | 1928380     | 1:50     |
| KIR2DL1               | PE           | HP3-E4   | BD Biosciences  | 556063         | 86798       | 1:20     |
| KIR2DL1/S1            | PE           | EB6      | Beckman Coulter | A09778         | 12          | 1:50     |
| KIR2DL2/L3/S2         | PE           | GL183    | Beckman Coulter | IM2278U        | 200051      | 1:50     |
| KIR2DL4               | PE           | 181703   | R&D Systems     | FAB2238P       | AAHO0209081 | 1:10     |
| KIR2DS4               | PE           | FES172   | Beckman Coulter | IM3337         | 200037      | 1:40     |
| KIR3DL1               | PE           | DX9      | BD Biosciences  | 555967         | 121769      | 1:80     |
| KIR3DL1/S1            | PE           | Z27      | Beckman Coulter | IM3292         | 200044      | 1:20     |
| KIR3DL2               | PE           | #539304  | R&D Systems     | FAB2878P       | ADBO0217051 | 1:10     |
| LAG3                  | PE-Cy7       | 11C3C65  | BioLegend       | 369309         | B289009     | 1:100    |
| NKG2A                 | APC          | z199     | Beckman Coulter | A60797         | 200046      | 1:30     |
| NKG2C                 | PE           | 134591   | Beckman Coulter | FAB138P        | LCN0818011  | 1:20     |
| NKG2D                 | PE-Cy7       | 1D11     | BD Biosciences  | 562365         | 9045733     | 1:300    |

|                    |             |       |                   |            |          |        |
|--------------------|-------------|-------|-------------------|------------|----------|--------|
| NKp44              | APC         | P44-8 | BioLegend         | 325109     | B160899  | 1:20   |
| NKp46              | PE          | 9E2   | BioLegend         | 331907     | B150121  | 1:20   |
| PD-1               | PE          | MIH4  | eBioscience       | 12-9969-42 | 1952441  | 1:30   |
| Perforin*          | PE-Cy7      | dG9   | BioLegend         | 308125     | B215704  | 1:20   |
| TCR $\gamma\delta$ | BV421       | 11F2  | BD Biosciences    | 744870     | 9340519  | 1:80   |
| TCR $\gamma\delta$ | BV650       | 11F2  | BD Biosciences    | 745359     | 7222894  | 1:40   |
| TCR V $\delta$ 1   | FITC        | TS8.2 | Invitrogen        | TCR2730    | UH286015 | 1:50   |
| TCR V $\delta$ 2   | PerCP-Cy5.5 | B6    | BioLegend         | 331424     | B279957  | 1:200  |
| TIGIT              | APC         | 1D11  | BD Biosciences    | 562365     | 9045733  | 1:300  |
| Live/dead          | nIR         | n.a.  | Life Technologies | L10119     | 1808830  | 1:1000 |

\* Detected intracellularly

### Videos (supplied separately):

**Video 1. Killing of CRC cells upon co-culture with  $\gamma\delta$  T cells.** Killing of HCT-15 cells (red) by  $\gamma\delta$  T cells (V $\delta$ 1<sup>+</sup>) from a MMR-d colon cancer in the presence of caspase-3/7 (green).  $\gamma\delta$  T cells were added at T=6h, and images were taken until 12 hours after (T=18h). Cancer cell apoptosis is visualized in yellow.

**Video 2. Pronounced cancer cell apoptosis upon co-culture with PD-1<sup>+</sup> (V $\delta$ 1<sup>+</sup>) as compared to PD-1<sup>-</sup>  $\gamma\delta$  T cells.** Killing of HCT-15 cells (red) by PD-1<sup>+</sup> (V $\delta$ 1<sup>+</sup>, left panel) as compared to PD-1<sup>-</sup> (V $\delta$ 2<sup>+</sup>, right panel)  $\gamma\delta$  T cells from a MMR-d colon cancer in the presence of caspase-3/7 (green).  $\gamma\delta$  T cells were added at T=5h, and images were taken until 12 hours after (T=17h). Cancer cell apoptosis is visualized in yellow.
